# Supplementary material
Source: publisher site journal article supplement (https://www.dovepress.com/article/354512)
Supplement: Supplementary file 1 [file get_supplementary_file.php]

1 APPENDIX

2  
3 Coronavirus Disease 2019 (COVID-19) questionnaire

4  
5 Date of birth:

6 Gender:

7 Religion:

8 Province:

9 Type of residential environment:

10 Education:

11 Occupation:

12 Salary:

13 The number of people who live in your house (including yourself):

14  
15 Questions

16  
17 *Part 1*

18  
19 Here are questions regarding knowledge and practices toward coronavirus disease  
20 2019 (COVID-19).

- 21  
22 1. How do you know about COVID-19? (You can select more than one  
23 answer.)
- 24 a. Browsing websites
  - 25 b. Watching television
  - 26 c. Hearing from health workers
  - 27 d. Hearing through the grapevine
  - 28 e. Listening to the radio
  - 29 f. Other (Please specify): \_\_\_\_\_
- 30 2. What are the early signs and symptoms of COVID-19? (You can select more  
31 than one answer.)
- 32 a. Fever
  - 33 b. Cough
  - 34 c. Tiredness
  - 35 d. Sore throat
  - 36 e. Runny nose
  - 37 f. Myalgia
  - 38 g. Diarrhea
  - 39 h. Severe pneumonia
  - 40 i. Vomiting

- 41 j. Death  
42 k. Abdominal pain  
43 l. Rash  
44 m. Multiple organ failure  
45 n. Arthralgia  
46 o. Hepatitis  
47 p. Bleeding in the gum  
48 q. Bleeding tendency  
49 r. Petechiae  
50 s. Other (Please specify):\_\_\_\_\_
- 51 3. What are the risk groups for severe COVID-19? (You can select more than  
52 one answer.)
- 53 a. Elderly people  
54 b. People with a chronic medical condition  
55 c. Children  
56 d. Everyone has the same risk for severe COVID-19  
57 e. Working-age people  
58 f. Teenagers  
59 g. Other (Please specify):\_\_\_\_\_
- 60 4. How does COVID-19 spread? (You can select more than one answer.)
- 61 a. Saliva  
62 b. Snot  
63 c. Sputum  
64 d. Tears  
65 e. Stool  
66 f. Genital discharge  
67 g. Urine  
68 h. Blood  
69 i. Breast milk  
70 j. Other (Please specify):\_\_\_\_\_
- 71 5. Which of the following situations can cause a COVID-19 outbreak? (You  
72 can select more than one answer.)
- 73 a. Coughing in public without covering your mouth  
74 b. Being at a place where there are many people  
75 c. Eating at the same table with other people  
76 d. Sharing personal items  
77 e. Staying close together  
78 f. Drinking from the same glass  
79 g. Hugging other people  
80 h. Touching escalator handrails

- 81 i. Speaking loudly  
82 j. Sexual intercourse  
83 k. Playing with a dog  
84 l. Mosquito bite
- 85 6. Which of the following situations can prevent a COVID-19 outbreak? (You  
86 can select more than one answer.)  
87 a. Washing hands with soap  
88 b. Wearing a face masks  
89 c. Using a personal utensil  
90 d. Staying at home  
91 e. Eating well-cooked food  
92 f. Using herbs  
93 g. Using an amulet, talisman, or charm
- 94 7. Which of the following methods can clean and disinfect the environment and  
95 surfaces in the context of COVID-19? (You can select more than one  
96 answer.)  
97 a. Application of 70% alcohol  
98 b. Washing with soap  
99 c. Application of heat, such as boiling, sun drying, etc.  
100 d. Application of disinfectant  
101 e. Wind drying
- 102 8. The 14-day self-quarantine is appropriate.  
103 a. Agree  
104 b. Disagree
- 105 9. If you think 14 days is not appropriate, how many days are appropriate for  
106 you?  
107 a. Answer: \_\_\_\_\_
- 108 10. What should you do at home during self-quarantine? (You can select more  
109 than one answer.)  
110 a. Wash your hands with soap regularly  
111 b. Meet with other people by using the internet  
112 c. Use your utensil  
113 a. Wear a face mask  
114 b. Self-isolation  
115 c. Bed rest  
116 d. Avoid touching your face  
117 e. Practice routine cleaning of frequently touched surfaces, such as  
118 doorknobs, computer keyboards, etc.  
119 f. Cough or sneeze into your elbow, not your hands, if you do not have  
120 tissue paper.

- 121 g. Close the toilet lid before flushing
- 122 h. Sleep late
- 123 i. Other (Please specify):\_\_\_\_\_

124 11.Asymptomatic COVID-19 patients can spread the disease to others.

- 125 a. Agree
- 126 b. Disagree

127 12.What hotline number should you call when you suspect someone in your  
128 neighborhood has COVID-19?

129 Answer:\_\_\_\_\_

130 13.What are the consequences of violating the terms and conditions of the  
131 community-wide containment measures? (You can select more than one  
132 answer.)

- 133 a. Fine
- 134 b. Imprisonment
- 135 c. Forfeiture of property
- 136 d. Death penalty
- 137 e. None
- 138 f. Other (Please specify):\_\_\_\_\_

139  
140  
141 *Part 2*

142  
143 Here are statements regarding attitudes toward coronavirus disease 2019 (COVID-  
144 19).

- 145
- 146 1. You have enough knowledge to protect yourself against COVID-19.
- 147 a. Agree
- 148 b. Neither agree nor disagree
- 149 c. Disagree

- 150 2. Today, people are far too concerned about COVID-19, even if there are
- 151 more important things, such as the economy, freedom, etc.
- 152 a. Agree
- 153 b. Neither agree nor disagree
- 154 c. Disagree

- 155 3. You have a risk of getting COVID-19.
- 156 a. Agree
- 157 b. Neither agree nor disagree
- 158 c. Disagree

- 159 4. You will do the things you want to live a regular life, such as meeting with
- 160 friends, even against the government recommendation.

- 161 a. Agree  
162 b. Neither agree nor disagree  
163 c. Disagree
- 164 5. You believe that there are alternative treatments for COVID-19, such as  
165 herbs, meditation, etc.  
166 a. Agree  
167 b. Neither agree nor disagree  
168 c. Disagree
- 169 6. When someone close to you is infected with COVID-19, you will keep it  
170 quiet.  
171 a. Agree  
172 b. Neither agree nor disagree  
173 c. Disagree
- 174 7. Traveling internationally during the COVID-19 outbreak is a good idea  
175 because airline tickets are cheap.  
176 a. Agree  
177 b. Neither agree nor disagree  
178 c. Disagree
- 179 8. Community-wide containment measures are unnecessary because many  
180 people are already infected.  
181 a. Agree  
182 b. Neither agree nor disagree  
183 c. Disagree
- 184 9. You can complete a 14-day quarantine if you have confirmed or are  
185 suspected of having COVID-19.  
186 a. Agree  
187 b. Neither agree nor disagree  
188 c. Disagree
- 189 10. You are willing to buy things from the shop of a COVID-19 patient.  
190 a. Agree  
191 b. Neither agree nor disagree  
192 c. Disagree  
193
